# Supplementary material
Source: PubMed Central journal article supplement (PMC7008506)
Supplement: NIHMS1551375-supplement-Supplemental_Figures_and_Tables.pdf [file NIHMS1551375-supplement-Supplemental_Figures_and_Tables.pdf]

**Cell Chemical Biology, Volume 26**

**Supplemental Information**

**A Highly Productive, One-Pot Cell-Free  
Protein Synthesis Platform Based on  
Genomically Recoded *Escherichia coli***

**Benjamin J. Des Soye, Vincent R. Gerbasi, Paul M. Thomas, Neil L. Kelleher, and Michael C. Jewett**

**Figure S1. Single lysine mutations are insufficient to confer resistance to OmpT proteolysis.** *Related to Figure 4.* Comparison between C321. $\Delta$ A.759.T7 and mutant strains in which K183 has been mutated to glycine (C321. $\Delta$ A.759.T7.K183G) or leucine (C321. $\Delta$ A.759.T7.K183L). **(a)** Characterization of the K183 mutants in CFPS. Lysates derived from C321. $\Delta$ A.759.T7 and the K183 mutant strains were directed to synthesize sfGFP in CFPS both with and without supplementation with purified T7 RNAP, and fluorescence was measured after incubation for 20 hrs at 30°C. Three independent CFPS reactions were performed for each condition, and one standard deviation is shown. **(b)**  $\alpha$ -His western blot comparison of the K172 mutant strains.

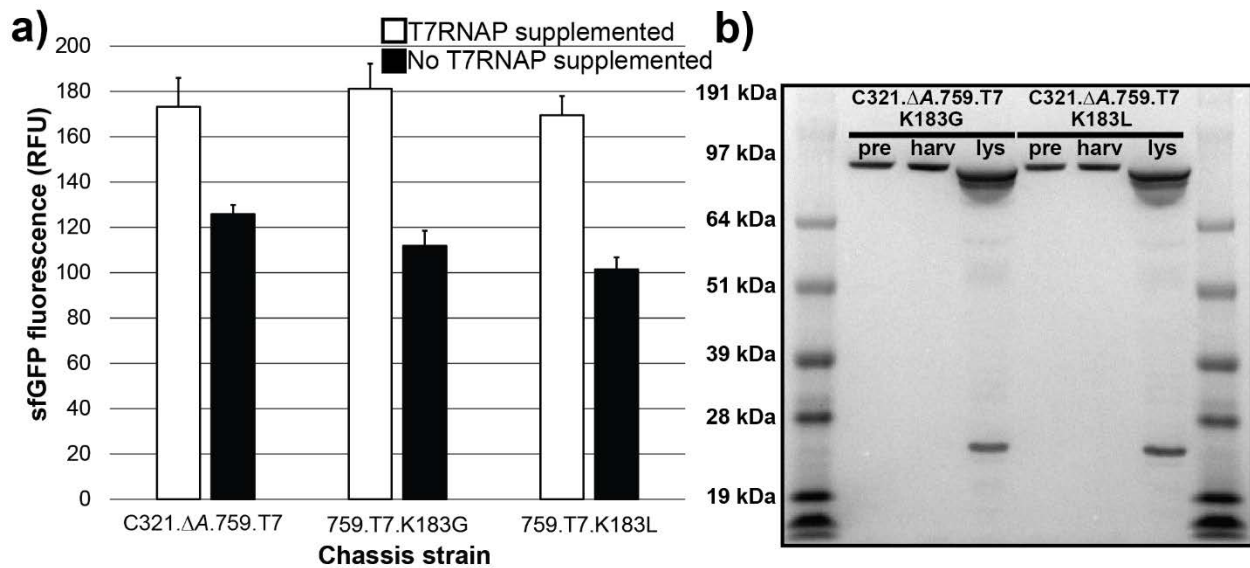

**Figure S2. Optimization of orthogonal translation system (OTS) component supplementation for performing amber suppression using 759.T7.Opt lysates.** Related to Figure 6. 759.T7.Opt lysates were directed to synthesize sfGFP2UAG in CFPS with T7RNAP supplemented. Concentrations of pAcF OTS components (pAcF, (a); pAcFRS, (b); o-tz-tRNA linear expression template (LET)<sup>1</sup>, (c)) were titrated to identify the optimal concentration of each component. 3 independent reactions were performed per condition, and one standard deviation is shown.

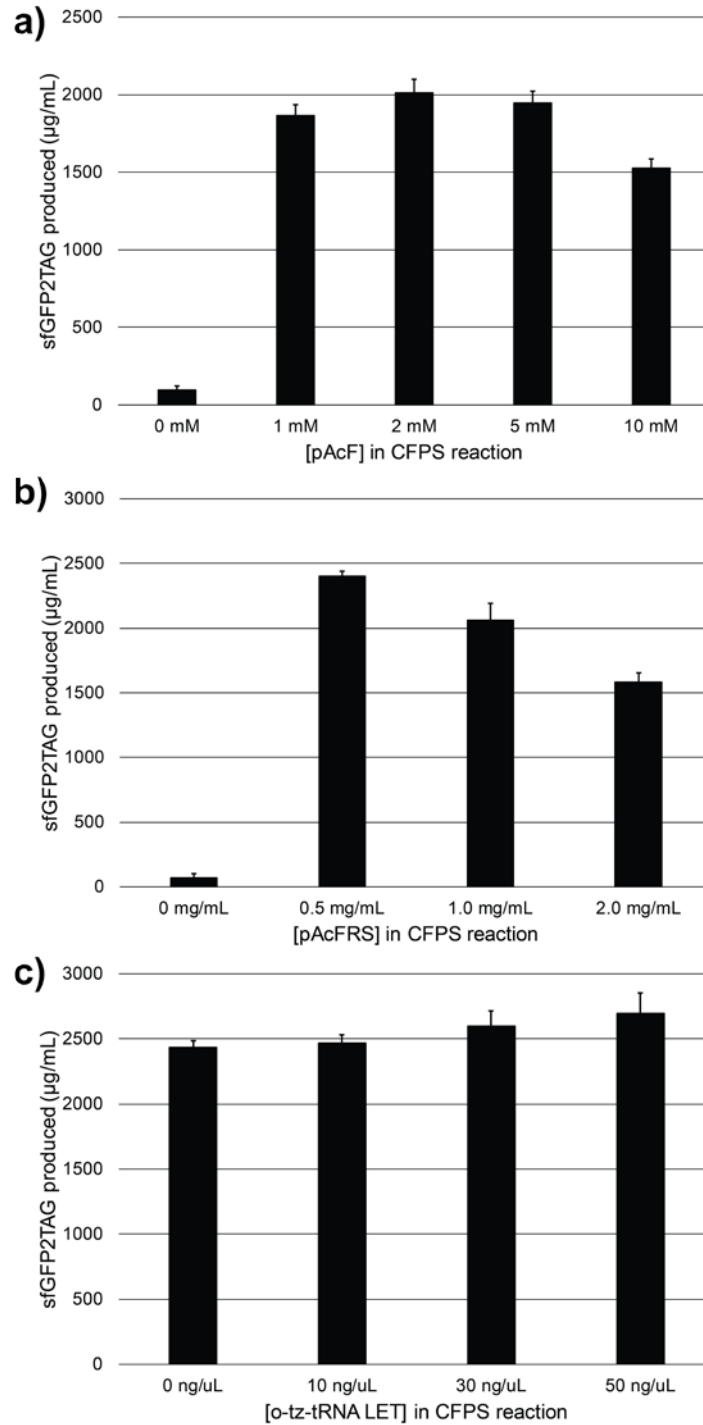

**Figure S3. UniDec deconvolution of ELP-40WT spectrum.** *Related to Figure 7.* **(a)** the unmodified input spectrum for this construct. Circles designate charge state peaks used by the algorithm to deconvolute the intact mass of the species. **(b)** the deconvoluted mass spectrum generated by the algorithm. The main peak indicated by the circle has an intact mass of 52,478 Da.

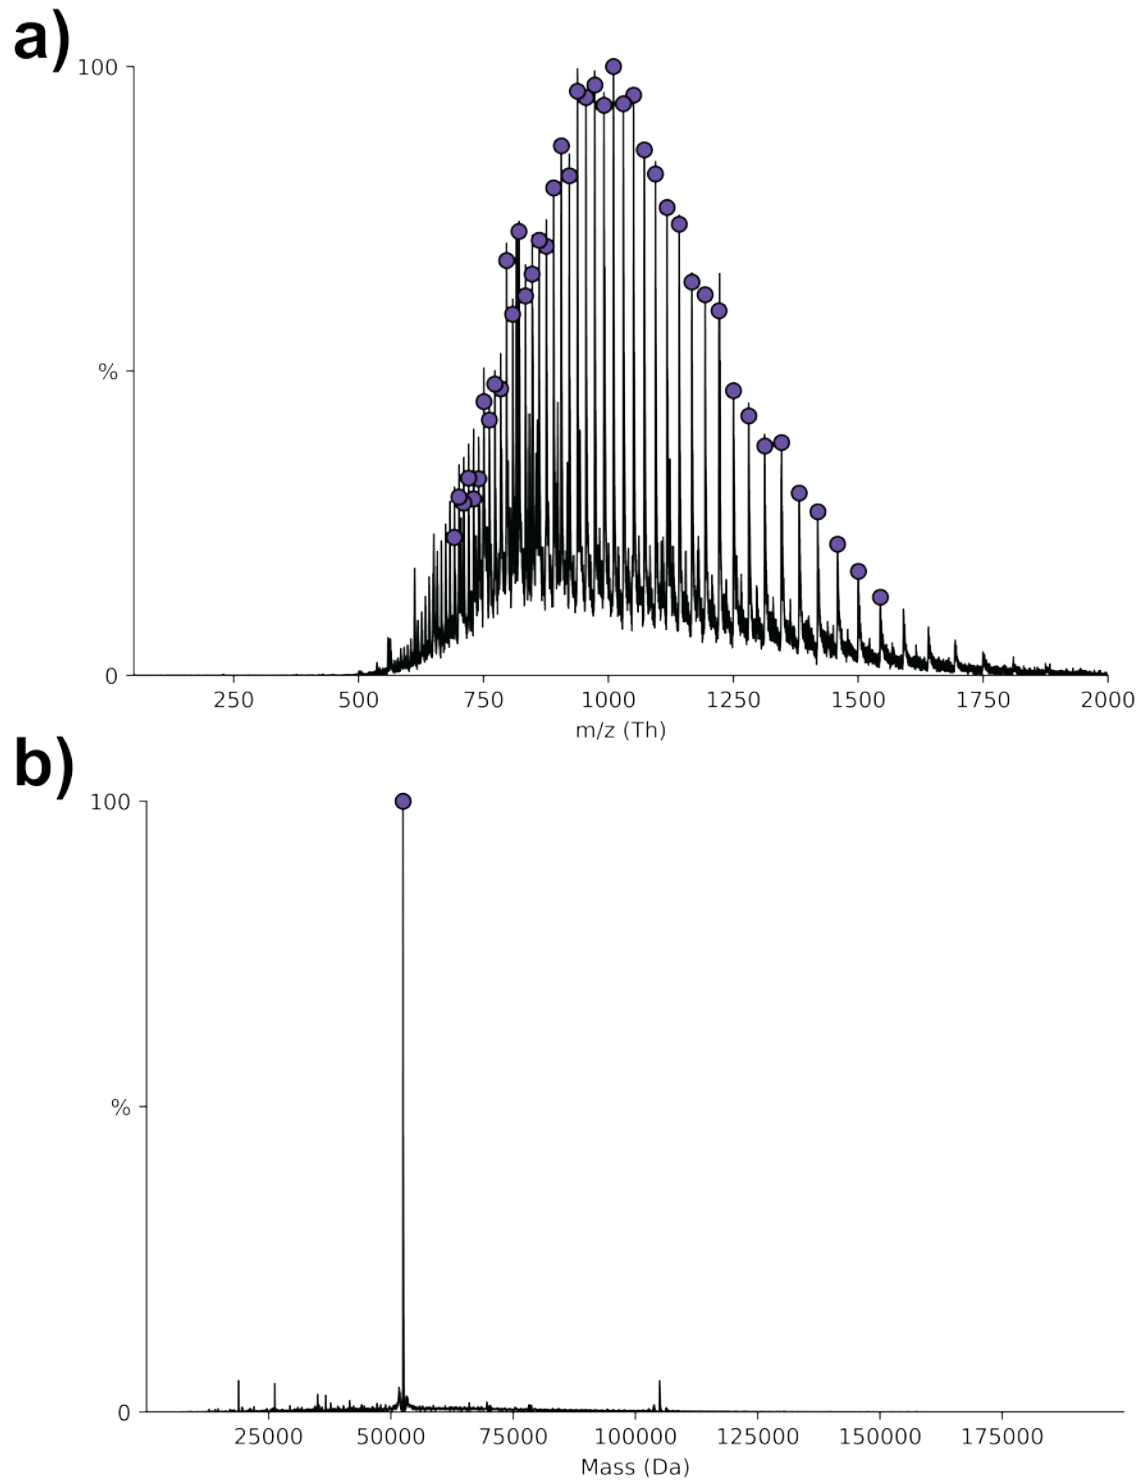

**Figure S4. UniDec deconvolution of ELP-40UAG spectrum.** *Related to Figure 7.* **(a)** background-subtracted input spectrum for this construct (Subtract curved, value 25.0). Circles designate charge state peaks used by the algorithm to deconvolute the intact mass of the species. **(b)** the deconvoluted mass spectrum generated by the algorithm. The main peak indicated by the circle has an intact mass of 53,540 Da.

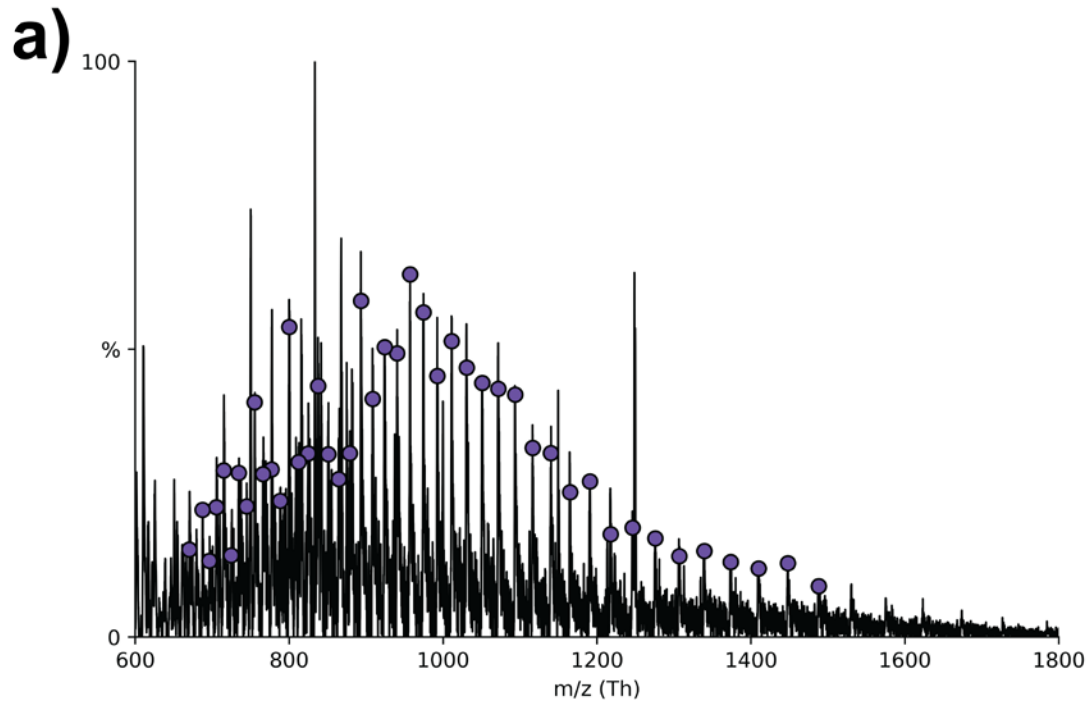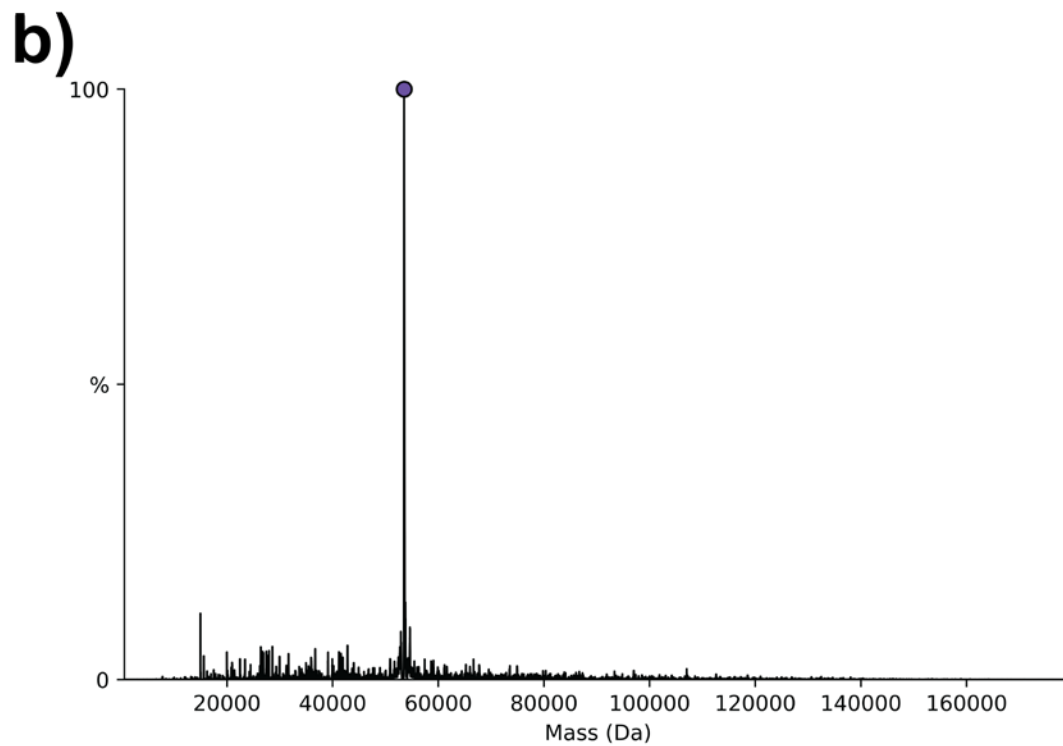

**Table S1.** Primers used for insert component amplification and assembly, *ompT* knockout, MAGE, colony PCR, T7 plasmid cloning, and DNA sequencing. Underlined bold text indicates location of mismatches. The first four bases of the 5'-MAGE oligonucleotides were phosphorothioated (\*). *Related to Figures 2, 4, and 5.*

| <b>Primer Name</b>          | <b>DNA Sequence (listed 5' to 3')</b>                                                                                                       |
|-----------------------------|---------------------------------------------------------------------------------------------------------------------------------------------|
| <b>T7 insert assembly</b>   |                                                                                                                                             |
| lacUV5_asl_F                | TGTAGGCTGGATAAGATGCGTCAGCATCGCATCCGGCAAAGGCAGA<br>TCTCGCTTCCGGCTCGTATAATGTGT                                                                |
| PtacI_asl_F                 | TGTAGGCTGGATAAGATGCGTCAGCATCGCATCCGGCAAAGGCAGA<br>TCTCGAGCTGTTGACAATTAATCATCG                                                               |
| Lpp5_asl_F                  | TGTAGGCTGGATAAGATGCGTCAGCATCGCATCCGGCAAAGGCAGA<br>TTCATCAAAAAAAAAATATTGACAAC                                                                |
| asl_homology_R              | AATATCCACCACGCGCGCAGATTAAATCTGACTAAGCCGGCGCTATC<br>GCTGGTGGAAATCGAAATCTCGTGATGG                                                             |
| asl_F                       | TGTAGGCTGGATAAGATGC                                                                                                                         |
| asl_R                       | AATATCCACCACGCGCGCAG                                                                                                                        |
| lacUV5_int_F                | TGCTTCTCATAGAGTCTTGCAGACAAACTGCGCAACTCGTGAAAGGT<br>AGGGCTTCCGGCTCGTATAATGTGT                                                                |
| PtacI_int_F                 | TGCTTCTCATAGAGTCTTGCAGACAAACTGCGCAACTCGTGAAAGGT<br>AGGGAGCTGTTGACAATTAATCATCG                                                               |
| Lpp5_int_F                  | TGCTTCTCATAGAGTCTTGCAGACAAACTGCGCAACTCGTGAAAGGT<br>AGGATCAAAAAAAAAATATTGACAAC                                                               |
| int_homology_R              | ATTTTATGCGCGCACGAAAAGCATCAGGTCTTTCCTTCGAAGGGGAT<br>CCGGGTGGAAATCGAAATCTCGTGATGG                                                             |
| int_F                       | TGCTTCTCATAGAGTCTTGC                                                                                                                        |
| int_R                       | ATTTTATGCGCGCACGAAAAG                                                                                                                       |
| lacUV5_promRBS_R            | CGATCCTCTCATTTTGTACCTCCTTAGTTGCTTGCAATTGTTATCCGC<br>TCACAATTCC                                                                              |
| lacUV5_RBST7_F              | CAAATGAGAGGATCGCATCACCATCACCATCACGGATCCAACACG<br>ATTAACATCGCTAA                                                                             |
| Lpp5_promRBS_R              | GATCCTCTCATTATGTACCTCCTTACTGTTTTGTTTTAATTGTTATCCG<br>CTCACAATTCC                                                                            |
| Lpp5_RBST7_F                | CATAATGAGAGGATCGCATCACCATCACCATCACGGATCCAACACG<br>ATTAACATCGCTAA                                                                            |
| PtacI_promRBS_R             | ATCCTCTCATATATTACCTCCTTAGTAGCGCTGTGTGTAATTGTTATC<br>CGCTCACAATTCC                                                                           |
| PtacI_RBST7_F               | ATATATGAGAGGATCGCATCACCATCACCATCACGGATCCAACACG<br>ATTAACATCGCTAA                                                                            |
| T7_synterm_R                | CCTGTATCAGGCTGAAAATCTTACGCGAACGCGAAGTCCGACTC                                                                                                |
| synterm_F                   | GGACTTCGCGTTCGCGTAAGATTTTCAGCCTGATACAGG                                                                                                     |
| Synterm_kanR_R              | CTTTCTACGTGTTCCGCTTATAAAGTGTAAGCCTGG                                                                                                        |
| kanR_F                      | AAGCGGAACACGTAGAAAG                                                                                                                         |
| Synthetic_term<br>(L3S2P21) | GATTTTCAGCCTGATACAGGATTTTCAGCCTGATACAGCTCGGTACC<br>AAATTCAGAAAAGAGGCCTCCCGAAAGGGGGCCTTTTTTCGTTTT<br>GGTCCCCTTTTTGCGTTTCTACACCAGGCTTTACTTTAT |
| <b><i>ompT</i> knockout</b> |                                                                                                                                             |
| delompT_F                   | CGACTACATCCGTGAGGTGAATGTGGTGAAGTCTGCCCGTGTCGGTT<br>ATTGAAGCGGAACACGTAGAAAG                                                                  |

delompT\_R TAATGGTAAAAAGCTGTCACAATTCATAAAAAACCTTAATATACGCC  
ACCGGTGGAATCGAAATCTCGTGATG

**MAGE**

MAGE\_T7\_K172L T\*C\*G\*A\*CAACTTGCATAAATGCTTTCTTGTAGACGTGCCCTACGCG  
CAGGTTGAGTTGTTTCCTCAACGTTTTTCTTGAAGTGCTTAGCTTCA  
MAGE\_T7\_K172G T\*C\*G\*A\*CAACTTGCATAAATGCTTTCTTGTAGACGTGCCCTACGCG  
GCCGTTGAGTTGTTTCCTCAACGTTTTTCTTGAAGTGCTTAGCTTCA  
MAGE\_T7\_double C\*A\*G\*C\*CTCGACAACCTTGCATAAATGCTTTCGCGTAGACGTGCCCT  
ACGCGGCCGTTGAGTTGTTTCCTCAACGTTTTTCTTGAAGTGCTTAG  
delkanR\_oligo G\*G\*T\*T\*GGGCGTCGCTTGGTCGGTCATTTTGAACCCAGAGTCCCG  
CCATGCGAAACGATCCTCATCTGTCTCTTGATCAGATCTTGATCC  
delampR\_oligo T\*T\*T\*G\*CCGACTACCTTGGTGATCTCGCCTTTCACGTAGTGGACAA  
AACTCTTCCTTTTTCAATATTATTGAAGCATTTATCAGGGTTATGT  
T7delHis\_MAGE c\*a\*g\*t\*tcgatgtcagagaagtcggttcttagcgatgtaaatcgtgttCATTATGTACCTCCTTAC  
TGTTTTGTTTTAATTGTTATCCGCTCA

**Colony PCR**

K172L\_cPCR\_F\_mut CGTTGAGGAACAACCTCAACCTG  
K172G\_cPCR\_F\_mut CGTTGAGGAACAACCTCAACGG  
K172\_cPCR\_F\_wt CGTTGAGGAACAACCTCAACAA  
172mut\_cPCR\_R TTGTTGATTTTCCATGCGGTG  
K179A\_cPCR\_F\_mut CGCGTAGGGCACGTCTACGC  
K179\_cPCR\_F\_wt CGCGTAGGGCACGTCTACAA  
179mut\_cPCR\_R TTGGCGACCGCTAGGACTTTC  
pUC\_T7\_cPCR\_F GCGATAAGTCGTGTCTTACC  
pUC\_T7\_cPCR\_R CATGTAAACGTCTTCGTAGC  
delompT\_cPCR1\_F GGGACTATTGAGTACGAACG  
delompT\_cPCR2\_R CGAATCTCATAACGCAAACC  
T7delHisMASC\_His GCATCACCATCACCATCACG  
T7delHisMASC\_wtF GGAGGTACATAATGaacacg  
T7delHisMASC\_R tttccatcggtgttttgcg  
cureALL\_cPCR\_F ggcgataagtcgtgtcttac  
cureALL\_cPCR\_R ttgccatcctatggaactgc

**T7 plasmid cloning**

pUC\_T7asl\_F CTGCGCGCGTGGTGGATATTGCATGCATCTCCTCAGATTGATTTAAA  
pUC\_T7asl\_R CGCATCTTATCCAGCCTACAGCATGCATCTCCTCGCTCACTGACTCG  
CTG  
pUC\_T7int\_F TTTTCGTGCGCGCATAAAATGCATGCATCTCCTCAGATTGATTTAAA  
ACTTCAT  
pUC\_T7int\_R GCAAGACTCTATGAGAAGCAGCATGCATCTCCTCGCTCACTGACTCG  
CTG  
p15a\_T7asl\_F CTGCGCGCGTGGTGGATATTGCATGCATCTCCTCTCCCTTAACGTGA  
GTTTTCG  
p15a\_T7asl\_R CGCATCTTATCCAGCCTACAGCATGCATCTCCTCTGAGTCAGCAACA  
CC

## DNA Sequencing

|               |                              |
|---------------|------------------------------|
| T7_as1_seq1_F | GGCCGCCTGCGGTTGATTGC         |
| T7_as1_seq_R  | GTGTGGACCAGACATCCTTC         |
| T7_int_seq1_F | TTCAATTTTGTCCCCTCCCTGC       |
| T7_int_seq_R  | ACGAATACCTGAAAATTTATCAAGCAGC |
| T7_seq2_F     | AGCCGGAAGCCGTAGCGTAC         |
| T7_seq3_F     | ACGTTTACATGCCTGAGGTG         |
| T7_seq4_F     | GCTTCCTTGCGTTCTGCTTTG        |
| T7_seq5_F     | TCAAAGATAAGAAGACTGGAG        |
| T7_seq6_F     | GGGGCCTTTTTTCGTTTTGG         |
| T7_seq7_F     | GCAGCTGTGCTCGACGTTGTC        |
| pMAZ_seq      | caattcagcaaattggaacatcatc    |

## pMAZ plasmid assembly

|                 |                                            |
|-----------------|--------------------------------------------|
| T7delHis_oligo1 | gagcacTAATCGTGTGGATCCGTGAgttttagagctagaat  |
| T7delHis_oligo2 | ctaaaacTCACGGATCCAACACGATTAgtgctcagtatctct |
| pMAZbb_F        | AGCTAGAAAUAGCAAGTTAAAATAAGGC               |
| pMAZbb_R        | AGTATCTCUATCACTGATAGGGATGTCA               |
| pMAZCurebb_F    | gagaagcacacggtcacac                        |
| pMAZCurebb_R    | ttgccatcctatggaactgc                       |



**Table S2.** Strains and plasmids used in this study. Km<sup>R</sup>, Ap<sup>R</sup>, and Cm<sup>R</sup> are kanamycin, ampicillin, and chloramphenicol resistance, respectively. ‘Δ’ indicates deleted gene/feature, and ‘∇’ indicates gene(s) inserted into the genome at the specified locus behind the specified promoter. ‘{ }’ denote amino acid substitution mutations made in the *I* gene open reading frame. Related to Figures 2, 3, 4, 5, 6, and 7.

| Strains and plasmids          | Genotype/relevant characteristics                                                                                                                                                       | Source                   |
|-------------------------------|-----------------------------------------------------------------------------------------------------------------------------------------------------------------------------------------|--------------------------|
| <b>Strains</b>                |                                                                                                                                                                                         |                          |
| BL21 Star <sup>TM</sup> (DE3) | F <sup>-</sup> <i>ompT hsdS<sub>B</sub></i> (r <sub>B</sub> <sup>-</sup> m <sub>B</sub> <sup>-</sup> ) <i>gal dcm rne131</i> (DE3)                                                      | ThermoFisher             |
| C321.ΔA.759                   | C321.ΔA. <i>endA<sup>-</sup> gor<sup>-</sup> rne<sup>-</sup> mazF</i> , Ap <sup>R</sup>                                                                                                 | Martin et al., 2018.     |
| DH5α                          | F <sup>-</sup> <i>endA1 glnV44 thi-1 recA1 relA1 gyrA96 deoR nupG purB20 φ80dlacZΔM15 Δ(lacZYA-argF)U169, hsdR17(r<sub>K</sub><sup>-</sup>m<sub>K</sub><sup>+</sup>), λ<sup>-</sup></i> | ThermoFisher             |
| 759.T7.int.lacUV5             | C321.ΔA.759.∇1.int.lacUV5, Km <sup>R</sup>                                                                                                                                              | This study               |
| 759.T7.int.PtacI              | C321.ΔA.759.∇1.int.PtacI, Km <sup>R</sup>                                                                                                                                               | This study               |
| 759.T7.int.Lpp5               | C321.ΔA.759.∇1.int.Lpp5, Km <sup>R</sup>                                                                                                                                                | This study               |
| 759.T7.asl.lacUV5             | C321.ΔA.759.∇1.asl.lacUV5, Km <sup>R</sup>                                                                                                                                              | This study               |
| 759.T7.asl.PtacI              | C321.ΔA.759.∇1.asl.PtacI, Km <sup>R</sup>                                                                                                                                               | This study               |
| 759.T7.asl.Lpp5               | C321.ΔA.759.∇1.asl.Lpp5, Km <sup>R</sup>                                                                                                                                                | This study               |
| 759.T7.ΔkanR                  | C321.ΔA.759.∇1.asl.Lpp5.ΔKm <sup>R</sup>                                                                                                                                                | This study               |
| 759.T7.ΔompT                  | C321.ΔA.759.∇1.asl.Lpp5.ΔompT, Km <sup>R</sup>                                                                                                                                          | This study               |
| 759.T7.K172L                  | C321.ΔA.759.∇1.asl.Lpp5{K172L}, Km <sup>R</sup>                                                                                                                                         | This study               |
| 759.T7.K172G                  | C321.ΔA.759.∇1.asl.Lpp5{K172G}, Km <sup>R</sup>                                                                                                                                         | This study               |
| 759.T7.D                      | C321.ΔA.759.∇1.asl.Lpp5{K172G, K179A}, Km <sup>R</sup>                                                                                                                                  | This study               |
| 759.T7.D.ΔAbR                 | C321.ΔA.759.∇1.asl.Lpp5{K172G, K179A}.ΔKm <sup>R</sup> . ΔAp <sup>R</sup>                                                                                                               | This study               |
| 759.T7.Opt                    | C321.ΔA.759.∇1.asl.Lpp5{K172G, K179A, ΔHis}.ΔKm <sup>R</sup> . ΔAp <sup>R</sup>                                                                                                         | This study               |
| <b>Plasmids</b>               |                                                                                                                                                                                         |                          |
| pKD4                          | Km <sup>R</sup>                                                                                                                                                                         | Datsenko & Wanner, 2000. |
| pAR1219                       | Ap <sup>R</sup>                                                                                                                                                                         | Davanloo et al., 1984.   |
| pDPtacIAcRSTT1                | Km <sup>R</sup>                                                                                                                                                                         | de Boer et al., 1983.    |
| pDTT1-Lpp5-EF-Tu              | Km <sup>R</sup>                                                                                                                                                                         | Gan et al.,              |
| pY71-sfGFP                    | Km <sup>R</sup> , P <sub>T7</sub> ::super folder green fluorescent protein (sfGFP), C-terminal strep-tag                                                                                | Bundy & Swartz, 2010.    |
| pY71-sfGFP-T216amb            | pY71-sfGFP with amber codon at T216                                                                                                                                                     | Bundy & Swartz, 2010.    |
| pY71-sfGFP-2amb               | pY71-sfGFP with amber codon at N212 and T216                                                                                                                                            | Hong et al., 2014b.      |

|                   |                                                                                 |                      |
|-------------------|---------------------------------------------------------------------------------|----------------------|
| pY71-sfGFP-5amb   | pY71-sfGFP with amber codon at D36, K101, E132, D190, and E213                  | Hong et al., 2014b.  |
| pY71-pAcFRS       | $P_{T7}$ ::pAcFRS, C-terminal 6x histidine tag                                  | Hong et al., 2014b.  |
| pEVOL-pAcF        | $\text{Cm}^R$ , $P_{glnS}$ ::pAcFRS, $P_{araBAD}$ ::pAcFRS, $P_{proK}$ ::o-tRNA | Young et al., 2010.  |
| pY71-T7-tz-o-tRNA | $P_{T7}$ :: hammer-head ribozyme (tz), o-tRNA <sup>opt</sup> (o-tz-tRNA)        | Hong et al., 2014b.  |
| pUC-T7-int.lacUV5 | $\text{Km}^R$ , $P_{lacUV5}$ ::T7 RNAP w/int locus flanking homology            | This study           |
| pUC-T7-asl.lacUV5 | $\text{Km}^R$ , $P_{lacUV5}$ ::T7 RNAP w/asl locus flanking homology            | This study           |
| pUC-T7-asl.PtacI  | $\text{Km}^R$ , $P_{PtacI}$ ::T7 RNAP w/asl locus flanking homology             | This study           |
| pUC-T7-asl.Lpp5   | $\text{Km}^R$ , $P_{Lpp5}$ ::T7 RNAP w/asl locus flanking homology              | This study           |
| P15a-T7-asl.Lpp5  | $\text{Km}^R$ , $P_{Lpp5}$ ::T7 RNAP w/asl locus flanking homology              | This study           |
| P15a-T7-asl.PtacI | $\text{Km}^R$ , $P_{PtacI}$ ::T7 RNAP w/asl locus flanking homology             | This study           |
| P15a-T7-int.Lpp5  | $\text{Km}^R$ , $P_{Lpp5}$ ::T7 RNAP w/int locus flanking homology              | This study           |
| pMA7CR_2.0        | $\text{Ap}^R$ , $Tet$ ::Cas9, $ARA$ :: $\lambda\beta$ , $dam$                   | Ronda et al., 2016.  |
| pMAZ-SK           | $\text{Km}^R$ , $Tet$ ::gRNA                                                    | Ronda et al., 2016.  |
| pMAZ-ΔHis         | $\text{Km}^R$ , $Tet$ :: ΔHis gRNA                                              | This study           |
| pMAZ-Cure         | $\text{Km}^R$ , $Tet$ :: pMA7CR_2.0 gRNA                                        | This study           |
| pY71-FI-ELP20     | FI-ELP-20mer                                                                    | Martin et al., 2018. |
| pY71-FI-ELP30     | FI-ELP-30mer                                                                    | Martin et al., 2018. |
| pY71-FI-ELP40     | FI-ELP-40mer                                                                    | Martin et al., 2018. |
| pY71-FI-ELP20X    | FI-ELP-20mer with 20 amber sites                                                | Martin et al., 2018. |
| pY71-FI-ELP30X    | FI-ELP-30mer with 30 amber sites                                                | Martin et al., 2018. |
| pY71-FI-ELP40X    | FI-ELP-40mer with 40 amber sites                                                | Martin et al., 2018. |
